# Supplementary material for: SedDARE-IB: An open access repository of sediment data for Iberia and its continental margins
Source: Copernicus journal article supplement (doi:10.5194/essd-2024-210), 2024-07-03
Supplement: Supplementary file 1 [file TableS1_Torne_etal_SedDARE-IB.xlsx]

## Sheet: FINAL
Table 1.- Detailed list of the information included in the database presented in this work
	Name of dataset	Area	Longitud W	Longitud E	Latitud S	Latitud N	#points/ grid interval	Data from	min value (m)	max value (m)	average (m)	DOI	Main references
	Offshore: Depth to the top of the Acoustic Basement depth/ Onshore: Depth to the top of Basement
	Top_Basement_IAM_Part1_WGS84.xyz	West Atlantic Margin	-13.323	-7.001	35.608	42.070	31985	MCS	473.87	9999.96	6122.55		Banda et al. (1995); Torné et al. (2018)
	Top_Basement_IAM_Part2_WGS84.xyz	West Atlantic Margin	-13.322	-9.019	35.366	42.187	66811	MCS	366.87	9999.86	7711.82		Banda et al. (1995); Torné et al. (2018)
	Top_Basement_ISE_Off_Portugal_WGS84.xyz	West Atlantic Margin	-13.009	-9.031	40.171	42.651	167600	MCS	567.87	9992.77	6610.09		Sawyer (2006)
	Top_Basement_Peniche_Basin_WGS84.xyz	West Atlantic Margin	-12.122	-8.987	38.219	41.914	522747	MCS	159.82	11129.24	5339.15
	Top_Basement_N_LusitaniaB_WGS84.xyz	West Atlantic Margin	-9.601	-8.835	39.610	40.640	7873	MCS	200	2930	1774.47
	Top_Basement_Lines_Off_Lisbon_WGS84.xyz	West Atlantic Margin	-11.191	-9.802	37.959	39.591	24389	MCS	2902.64	11600.91	8205.58
	Top_Basement_Lines_Off_SPortugal_WGS84.xyz	West Atlantic/Onshore	-9.717	-8.780	37.025	38.439	3170	MCS/Gravity	0	7471.76	1626.95		Carvalho (1995)
	Top_Basement_Alentejo_and_Algarve_WGS84.xyz	West Atlantic/Gulf of Cadiz	-11.980	-7.190	34.491	38.448	1233572	MCS	169.34	10710.41	5118.07
	Top_Basement_Lower_Tagus_Basin_WGS84.xyz	Onshore Iberia	-10.002	-8.181	38.259	39.668	31991	MCS/Gravity	0.00	7397	3254.74		Carvalho et al. (2005, 2017)
	Top_Paleozoic_Basement_Onshore_IB_Basins_ETRS89.xyz	Onshore Iberia	-7.193	3.165	36.570	43.560	71149	MCS/Well logs	-1814.88	12958.65	1790.72		García-Lobón et al. (2010a)
	Top_Basement_WestMed_Basins_WGS84.xyz	West Mediterranean	-5.717	6.000	35.102	43.556	9970769	MCS/Well logs	0.00	89102	3011.61	https://doi.org/10.17882/80128 https://doi.org/xxxxxxxx	Bellucci et al. (2021)
	Depth to the base of the Tertiary
	Base_Cenozoic_IAM_Part1_WGS84.xyz	West Atlantic Margin	-13.324	-7.014	35.609	42.071	38571	MCS	216.02	9482.64	5595.25		Banda et al. (1995); Torné et al. (2018)
	Base_Cenozoic_IAM_Part2_WGS84.xyz	West Atlantic Margin	-13.226	-9.015	35.365	42.188	70084	MCS	240.24	9257.22	6550.93		Banda et al. (1995); Torné et al. (2018)
	Base_Cenozoic_ISE_Off_Portugal_WGS84.xyz	West Atlantic Margin	-13.009	-9.036	40.172	42.652	171011	MCS	310.02	8197.26	5625.64		Sawyer (2006)
	Base_Cenozoic_Peniche_WGS84.xyz	West Atlantic Margin	-12.124	-8.984	38.542	41.920	492599	MCS	129.34	7706.71	3376.72
	Base_Cenozoic_N_LusitaniaB_WGS84.xyz	West Atlantic Margin	-9.601	-8.835	39.610	40.641	7513	MCS/Well logs	70	920	503.7
	Base_Cenozoic_Lines_Off_Lisbon_WGS84.xyz	West Atlantic Margin	-11.193	-9.803	37.958	38.854	17844	MCS	1355.61	7927.66	6631.38
	Base_Cenozoic_Lines_Off_SPortugal_WGS84.xyz	West Atlantic Margin	-9.717	-8.793	37.066	38.460	1999	MCS/Gravity	38.95	3292.48	946.12		Carvalho (1995)
	Base_Cenozoic_Alentejo_Algarve_basins_Part1_WGS84.xyz	West Atlantic/Gulf of Cadiz	-11.978	-7.491	35.746	38.449	1026658	MCS	112.98	8943.42	3848.38
	Base_Cenozoic_Alentejo_Algarve_basins_Part2_WGS84.xyz	West Atlantic/Gulf of Cadiz	-9.191	-7.195	34.500	36.985	193729	MCS	488.76	6564.05	2703.54
	Base_Cenozoic_Lower_Tagus_Basin_WGS84.xyz	Onshore Iberia	-9.264	-7.942	38.259	39.660	48117	MCS	0.00	2788.36	1151.88		Carvalho et al. (2005, 2017)
	Base_Cenozoic_Ebro_Basin_ETRS89.xyz	Onshore Iberia	-2.339	3.172	40.877	42.955	46616	MCS/Well logs	0.00	6075.51	1821.32		García-Lobón et al. (2010b)
	Base_Cenozoic_Duero_Basin_ETRS89.xyz	Onshore Iberia	-5.736	-1.285	40.777	43.390	30681	MCS/Well logs	0.00	5022.58	1080.99		García-Lobón et al. (2010c)
	Base_Cenozoic_Tajo_Basin_ETRS89.xyz	Onshore Iberia	-4.875	0.276	39.611	42.372	21973	MCS/Well logs	0.00	3835.88	1211.85		García-Lobón et al. (2010d)
	Base_Cenozoic_Guadalquivir_Basin_ETRS89.xyz	Onshore Iberia	-7.171	0.083	36.888	39.005	24951	MCS/Well logs	0.00	3999.05	1275.15		García-Lobón et al. (2010e)
	Base_Cenozoic_Mallorca_Island_ETRS89.xyz	Onshore Balearic Islands	2.597	2.1000	39.334	39.785	994	MCS/Well logs	0.05	1987.37	558.29		García-Lobón et al. (2010a)
	Base_Cenozoic_Valencia_Trough_WGS84.xyz	West Mediterranean	-0.251	3.3000	38.832	42.252	3602022	MCS/Well logs	190.5	5167.9	2458.73	https://doi.org/10.17882/80128 https://doi.org/xxxxxxxx	Bellucci et al. (2021)
	Base_Cenozoic_Alboran_Basin_WGS84.xyz	West Mediterranean	-5.376	-1.501	35.102	36.813	2405230	MCS/Well logs	41.3	8910.2	2684.39	https://doi.org/10.17882/80128 https://doi.org/xxxxxxxx	Bellucci et al. (2021)
	Algarve_PaleogeneUnc_TopUpperK_cokriginig_WGS84.xyz	West Atlantic	-9.147	-7.280	35.881	36.961	13,581/xx'	MCS/Gravity	277.34	5363.93	2284.34		Matias (2007)
